# Supplementary material for: Large scale computational screening and experimental discovery of novel materials for high temperature CO2 capture
Source: Royal Society of Chemistry journal article supplement (doi:10.1039/c5ee03253a), 2016-01-01
Supplement: c5ee03253a1.pdf [file c5ee03253a1.pdf]

# Supporting information for: Large scale computational screening and experimental discovery of novel materials for high temperature CO<sub>2</sub> capture

Matthew T. Dunstan,<sup>†</sup> Anubhav Jain,<sup>‡</sup> Wen Liu,<sup>¶</sup> Shyue Ping Ong,<sup>§</sup> Tao Liu,<sup>†</sup>  
Jeongjae Lee,<sup>†</sup> Kristin A. Persson,<sup>||</sup> Stuart A. Scott,<sup>⊥</sup> John S. Dennis,<sup>#</sup> and Clare  
P. Grey<sup>\*,†</sup>

*Department of Chemistry, University of Cambridge, Lensfield Road, Cambridge, CB2 1EW,  
United Kingdom, Computational Research Division, Lawrence Berkeley National Laboratory, 1  
Cyclotron Rd, Berkeley, CA 94720, United States of America, Cambridge Centre for Advanced  
Research in Energy Efficiency in Singapore, 62 Nanyang Drive, NTU, Singapore 637459,  
Department of NanoEngineering, University of California San Diego, 9500 Gilman Drive, Mail  
Code 0448, La Jolla, California 92093-0448, United States of America, Department of Materials  
Science and Engineering, University of California Berkeley, 210 Hearst Mining Building,  
Berkeley, CA 94720, United States of America, Department of Engineering, University of  
Cambridge, Trumpington Street, Cambridge CB2 1PZ, United Kingdom, and Department of  
Chemical Engineering and Biotechnology, University of Cambridge, Pembroke Street,  
Cambridge, CB2 3RA, United Kingdom*

E-mail: [cpg27@cam.ac.uk](mailto:cpg27@cam.ac.uk)

## Energy penalty calculations

If the temperatures for the carbonation and calcination reactors are set by the theoretical carbonation equilibrium of the material, the inlet  $p_{\text{CO}_2}$  (chosen to be 0.15 for a typical flue gas) and the outlet  $p_{\text{CO}_2}$  (chosen to be 1.00 for production of pure  $\text{CO}_2$ ), then the total diverted energy from the power process per mole of  $\text{CO}_2$  absorbed ( $m_{\text{CO}_2}$ ) is given by:

$$Q_{\text{loss}} = \frac{\Delta H_{\text{calcination}} + C_p(T_{\text{calcination}} - T_{\text{carbonation}})}{m_{\text{CO}_2}} \quad (1)$$

where  $C_p$  is the molar heat capacity of the sorbent material,  $T_{\text{calcination}}$  is the temperature of calcination,  $T_{\text{carbonation}}$  is the temperature of carbonation and  $\Delta H_{\text{calcination}} = -\Delta H_{\text{carbonation}}$ . Assuming a Carnot efficiency, the work lost due to this diverted heat is

$$W_{\text{loss}} = Q_{\text{loss}} \left( 1 - \frac{T_{\text{environment}}}{\min(T_{\text{calcination}}, T_h)} \right) \quad (2)$$

where  $T_{\text{environment}}$  is chosen to be room temperature, 298 K, and  $T_h$  is the operating temperature of the power cycle, which was assumed to be 623 K.

However, there is a need to consider the amount of work that can be recovered by reintegrating the heat from the carbonator, which will reduce the total  $W_{\text{loss}}$ . The heat rejected by the CCS process is given by:

---

\*To whom correspondence should be addressed

†Department of Chemistry, University of Cambridge, Lensfield Road, Cambridge, CB2 1EW, United Kingdom

‡Computational Research Division, Lawrence Berkeley National Laboratory, 1 Cyclotron Rd, Berkeley, CA 94720, United States of America

¶Cambridge Centre for Advanced Research in Energy Efficiency in Singapore, 62 Nanyang Drive, NTU, Singapore 637459

§Department of NanoEngineering, University of California San Diego, 9500 Gilman Drive, Mail Code 0448, La Jolla, California 92093-0448, United States of America

||Department of Materials Science and Engineering, University of California Berkeley, 210 Hearst Mining Building, Berkeley, CA 94720, United States of America

⊥Department of Engineering, University of Cambridge, Trumpington Street, Cambridge CB2 1PZ, United Kingdom

#Department of Chemical Engineering and Biotechnology, University of Cambridge, Pembroke Street, Cambridge, CB2 3RA, United Kingdom

$$Q_{recovered} = Q_{loss} - \Delta H_{CO_2,flow} \quad (3)$$

where  $\Delta H_{CO_2,flow}$  is the net molar enthalpy flow between the CO<sub>2</sub> inlet and outlet. Therefore the recovered work from this heat can be calculated:

$$W_{recovered} = Q_{recovered} \left( 1 - \frac{T_{environment}}{T_{carbonation}} \right) \quad (4)$$

and the total energy penalty,  $E_p$  is given by:

$$E_p = W_{loss} - W_{recovered} \quad (5)$$

## Surface area analysis

The results from the BET SSA analysis are shown in Table S1.

Table S1: Results of the SSA and total pore volume measurements for the candidate materials studied here, along with other similar previously studied materials. The total pore volume was determined from N<sub>2</sub> absorption.

| Compound                                       | BET SSA (m <sup>2</sup> /g) | Total pore volume (cm <sup>3</sup> /g) |
|------------------------------------------------|-----------------------------|----------------------------------------|
| Mg <sub>6</sub> MnO <sub>8</sub>               | 1.6018                      | 0.169809                               |
| Ca <sub>4</sub> Nb <sub>2</sub> O <sub>9</sub> | 0.3813                      | 0.033179                               |
| Na <sub>3</sub> SbO <sub>4</sub>               | 0.3787                      | 0.001239                               |
| Li <sub>5</sub> FeO <sub>4</sub>               | < 0.1                       | < 0.001                                |
| Li <sub>6</sub> CoO <sub>4</sub>               | 1.00813                     | 0.018272                               |
| Li <sub>4</sub> SiO <sub>4</sub>               | 0.6778                      | 0.004228                               |
| Li <sub>5</sub> AlO <sub>4</sub>               | 2.7585                      | 0.015195                               |
